# Supplementary material for: 3D printed graphene-based self-powered strain sensors for smart tires in autonomous vehicles
Source: PubMed Central journal article supplement (PMC7588488; doi:10.1038/s41467-020-19088-y), 2020-10-26
Supplement: 41467_2020_19088_MOESM3_ESM.pdf [file 41467_2020_19088_MOESM3_ESM.pdf]

## Description of Additional Supplementary Files

File name: Supplementary Movie 1

Description: Field test experimental setup for collecting data from 3D printed strain sensor in real life environment

File name: Supplementary Movie 2

Description: Demonstration of wireless data transfer powered by energy stored from the piezoelectric tire energy harvester
